# Supplementary material for: Cardiac Magnetic Resonance Identifies Responders to Cardiac Resynchronization Therapy with an Assessment of Septal Scar and Left Ventricular Dyssynchrony
Source: MDPI journal article supplement (doi:10.3390/jcm12227182), 2023-11-20
Supplement: s1 [file s1]

## **Supplemental material**

### **Figure S1. Examples of non-ischemic LGE.**

A): Example of midwall fibrosis (LGE) located in septum. B): Illustration of fibrosis (LGE) in the RV insertion point. C): Apparent hyperenhancement in the most basal short-axis slice, classified as partial volume effect, and not LGE.

LGE=late gadolinium enhancement; RV=right ventricular

### **Video S1. Septal flash.**

The video displays the rapid, early movement of the interventricular septum (septal flash) in 4-chamber view in a representative patient.
